# Supplementary material for: Generation of App knock-in mice reveals deletion mutations protective against Alzheimer’s disease-like pathology
Source: PubMed Central journal article supplement (PMC5935712; doi:10.1038/s41467-018-04238-0), 2018-05-04
Supplement: 41467_2018_4238_MOESM1_ESM.pdf [file 41467_2018_4238_MOESM1_ESM.pdf]

**Generation of App knock-in mice reveals deletion mutations protective against Alzheimer's disease-like pathology**

**Nagata et al.**

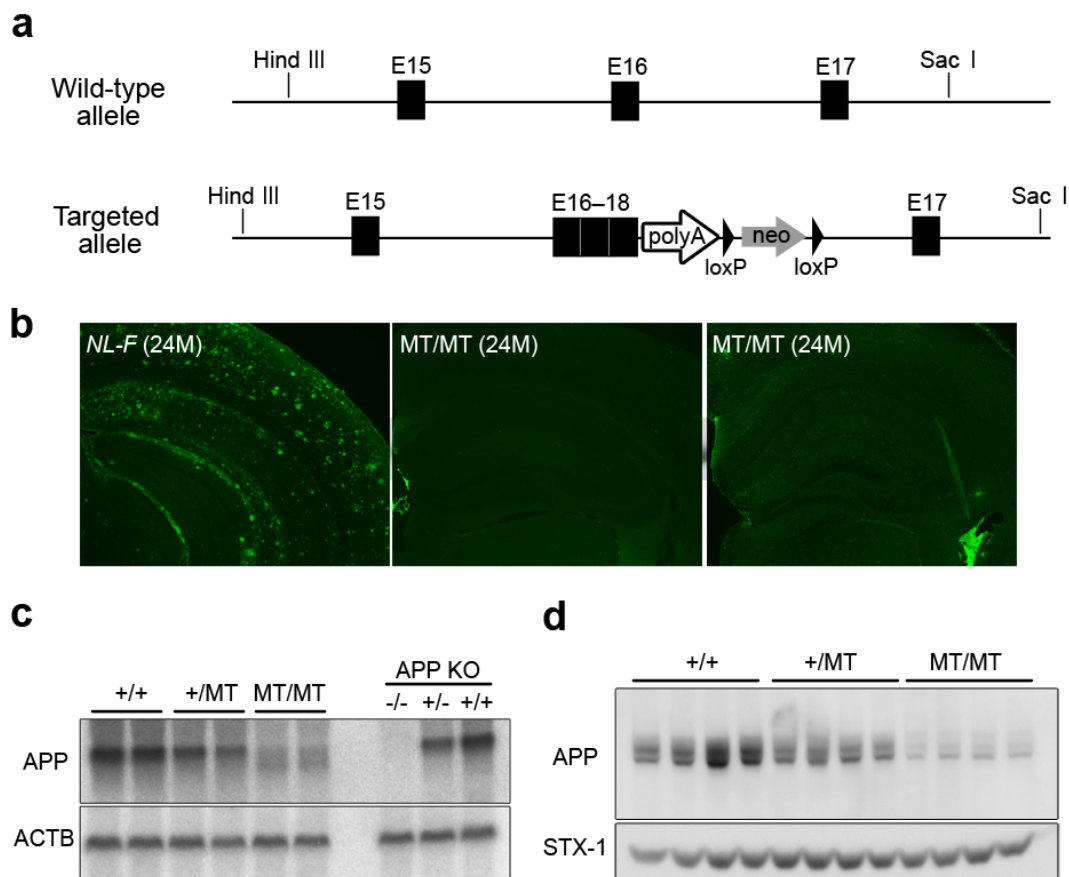

**Supplementary Fig 1. Previous *App* knock-in model did not show A $\beta$  accumulation in the brain.**

(a) Wild-type allele of *App* gene and the targeted allele of *App* knock-in model carrying a humanized A $\beta$  sequence as well as two clinically causative AD mutations in the Exons 16 or Exon 17. Note that The mutant lacks Introns 16 and 17 and most part of 3'-UTR. (b) In contrast to the *App*<sup>NL-F</sup> knock-in model<sup>7</sup>, which carries the same pathogenic mutations and the introns and 3'-UTR, no A $\beta$  deposition, was observed in the 24-month-old model without the introns and 3'-UTR (MT). (c) Northern blot analysis revealed that APP mRNA expression was clearly downregulated in the model without the introns and 3'-UTR (MT) in a gene dose-dependent manner. (d) APP expression was also decreased at protein levels. *ACTB*  $\beta$ -actin, *STX-1* Syntax-1.

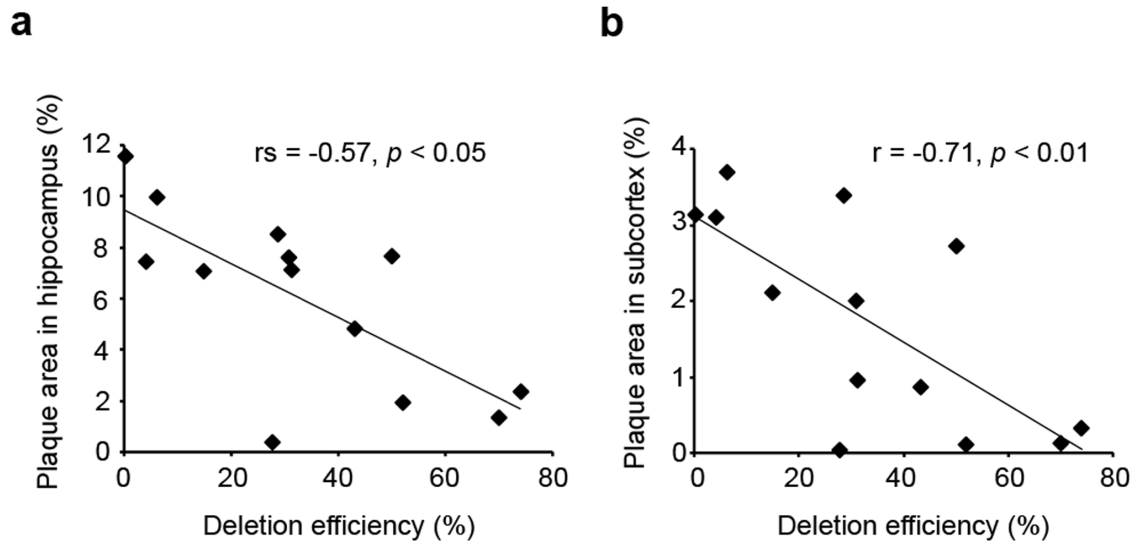

**Supplementary Fig 2. Reduction of A $\beta$  accumulation in *NL-G-F*  $\Delta$ UTR brains**

A negative correlation between A $\beta$  accumulation and genomic deletion efficiency was observed in 6-month-old *NL-G-F*  $\Delta$ UTR mouse ( $n = 13$ ) hippocampus (a) and subcortex (b).  $r$  and  $r_s$  indicate Pearson's correlation coefficient and Spearman's correlation coefficient, respectively.

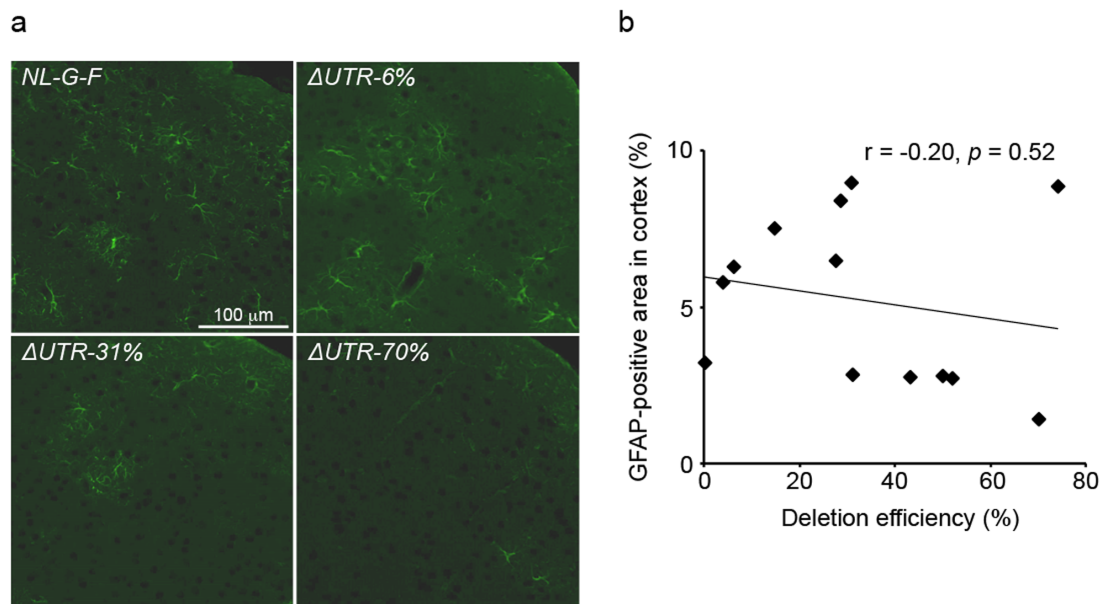

**Supplementary Fig 3. Relationship between gliosis area and genome editing efficiency in the *NL-G-F*  $\Delta$ UTR mouse cortex**

(a) GFAP-positive astrocytes were visualized in 6-month-old unedited *NL-G-F* as well as *NL-G-F*  $\Delta$ UTR mice. (b) A negative correlation between the GFAP-positive area and deletion efficiency was observed in 6-month-old *NL-G-F*  $\Delta$ UTR mouse cortex ( $n = 13$ ).  $r$  indicates Pearson correlation coefficient.

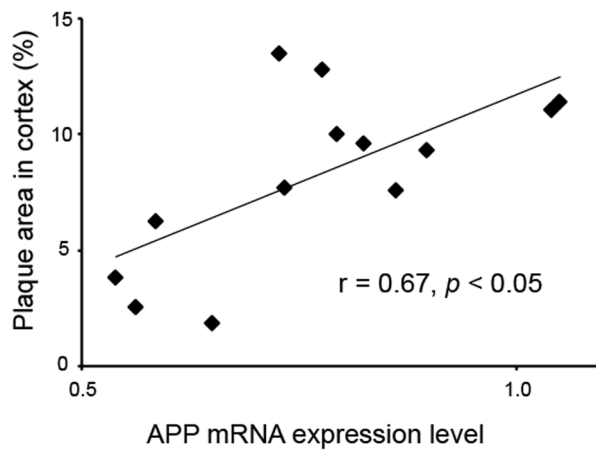

**Supplementary Fig 4. Relationship between plaque area and APP mRNA expression level in the *NL-G-F*  $\Delta$ UTR mouse cortex**

Relative quantitative RT-PCR was performed in 6-month-old *NL-G-F*  $\Delta$ UTR mouse cortex ( $n = 13$ ). APP mRNA levels are normalized to GAPDH level. Values relative to control *NL-G-F* mice are shown as individual points. A positive correlation between the plaque area and APP mRNA level was observed in 6-month-old *NL-G-F*  $\Delta$ UTR mouse cortexes.  $r$  indicates Pearson correlation coefficient.

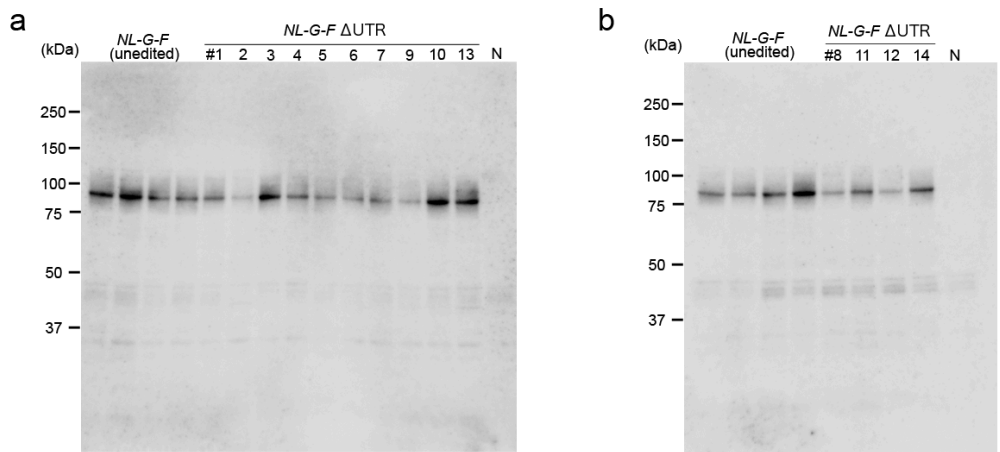

**Supplementary Fig 5. Full-length images of western blots**

Full-length images of APP western blots for 6-month-old male (a) and female (b) *NL-G-F*  $\Delta$ UTR mouse brains. N represents APP KO mouse samples used as negative controls.

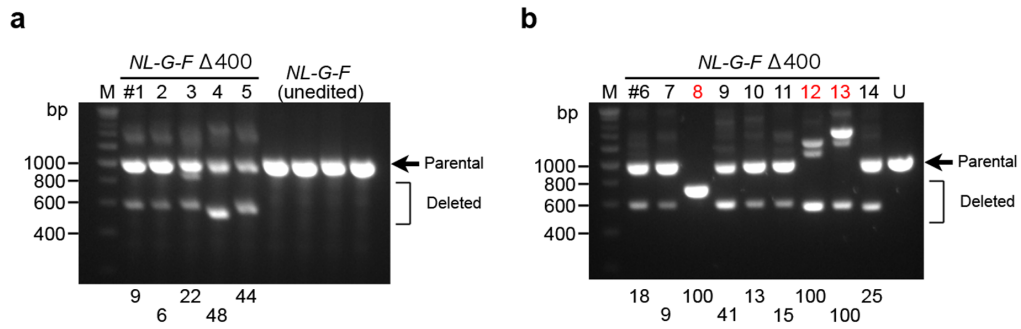

**Supplementary Fig 6. PCR-based genotyping results of *NL-G-F*  $\Delta$ 400 mice.**

Genotyping was performed using 6-month-old male (a) and female (b) *NL-G-F*  $\Delta$ 400 mouse brains. The deletion efficiency of each *NL-G-F*  $\Delta$ 400 mouse is represented on the bottom of each lane. Three mice (#8, 12, 13) were excluded from subsequent analyses because sequencing analyses showed relatively large insertions (#12, #13) or inverted sequence (#8) in their genome.

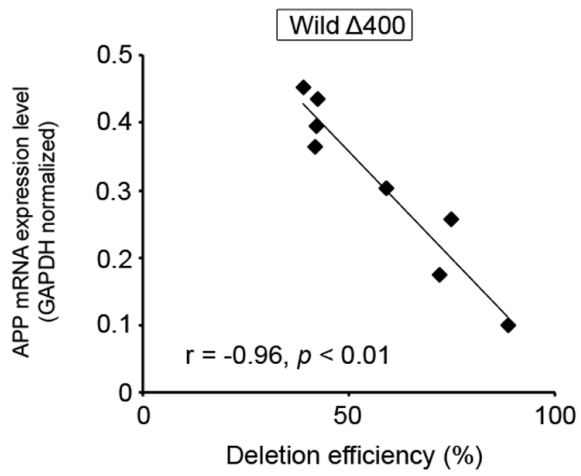

**Supplementary Fig 7. Relationship between deletion efficiency and APP mRNA expression level in the wild-type  $\Delta$ UTR mouse cortex**

Negative correlation between APP mRNA expression and genome editing efficiency in wild-type  $\Delta 400$  mouse brains ( $n = 8$ ).  $r$  indicates Pearson correlation coefficient.



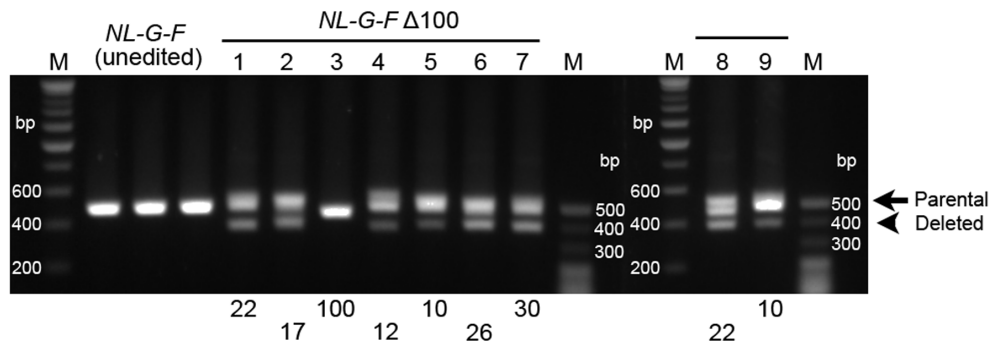

**Supplementary Fig 8. PCR-based genotyping results of *NL-G-F* Δ100 mice.**

Genotyping was performed using 6-month-old *NL-G-F* Δ100 mouse brains. The deletion efficiency of each *NL-G-F* Δ100 mouse is represented on the bottom of each lane. It was important to note that among the founder mice one mouse (#3) display homozygous deletion mutation (also see Fig. 3d).

|    |                                                                                                                                                                                                                                                           |                                                                   |
|----|-----------------------------------------------------------------------------------------------------------------------------------------------------------------------------------------------------------------------------------------------------------|-------------------------------------------------------------------|
| WT | CGCGCCACAGCAGCGGCCTCTGAACTTGGACAGCGAAACCATTGCTTCACTA                                                                                                                                                                                                      |                                                                   |
|    | PAM                      Target                                                                                                                                                                                                                           |                                                                   |
| #1 | CGCGCCACAGCAGCGGCCTCTGAACTTGGACAGCGAAACCATTGCTTCACT<br>CGCGCCACAGCAGCGGCCTCTG-----(-105bp)-----<br>CGCGCCACAGCAGCGGCCTCTG-----(-93bp)-----<br>CGCGCCACAGCAGCGGCCTCTGAACTTGGACAGCGAAACCATTGCTTCACTA                                                        | (mut, 7/12)<br>(mut, 3/12)<br>(mut, 1/12)<br>(wt, 1/12)           |
| #2 | CGCGCCACAGCAGCGGC-----(-105bp)-----<br>CGCGCCACAGCAGCGGCCTCTGAAC-----AGCGAAACCATTGCTTCACTA<br>CGCGCCACAGCAGCGGCCTCTGAACTTGGACAGCGAAACCATTGCTTCACTA                                                                                                        | (mut, 7/11)<br>(mut, 3/11)<br>(wt, 1/11)                          |
| #4 | CGCGCCACAGCAGCGGCCTCTGAACTTGGACAGCGAAACCATTGCTTCACT<br>CGCGCCACAGCAGCGGCCTCTGAACTTGGACAGCGAAACCATTGCTTCACTA<br>CGCGCCACAGCAGCGGC-----ACAGCGAAACCATTGCTTCACTA<br>CGCGCCACAGCAGCGGCCTCTGAAC-----AGCGAAACCATTGCTTCACTA                                       | (mut, 5/12)<br>(wt, 4/12)<br>(mut, 2/12)<br>(mut, 1/12)           |
| #5 | CGCGCCACAGCAGCGGCCTCTG-----(-93bp)-----<br>CGCGCCACAGCAGCGGCCTCTGAACTTGGACAGCGAAACCATTGCTTCACTA<br>CGCGCCACAGCAGCGGCCTCTGG-----(-94bp)-----<br>CGCGCCACAGCAGCGGCCTCTG-----GACAGCGAAACCATTGCTTCACTA<br>CGCGCCACAGCAGCGGCCTCTG-TGCTGTTTATATTGTTTAACTTGGACAG | (mut, 3/9)<br>(wt, 3/9)<br>(mut, 1/9)<br>(mut, 1/9)<br>(mut, 1/9) |
| #6 | CGCGCCACAGCAGCGGCCTCTG-----(-93bp)-----<br>CGCGCCACAGCAGCGGCCTCTG-----GACAGCCTCTTGGACAGCGAAACCATT<br>CGCGCCACAGCAGCGGCCTCTG-----CTTGGACAGCGAAACCATTGCTTCACTA                                                                                              | (mut, 6/10)<br>(mut, 3/10)<br>(mut, 1/10)                         |
| #7 | CGCGCCACAGCAGCGGCCTCTGA-----(-99bp)-----<br>CGCGCCACAGCAGCGGCCTCTGAAC-----AGCGAAACCATTGCTTCACTA                                                                                                                                                           | (mut, 7/12)<br>(mut, 5/12)                                        |
| #8 | CGCGCCACAGCAGCGGCCTCTGAACTTGGACAGCGAAACCATTGCTTCACT<br>CGCGCCACAGCAGCGGCCTCTG-----(-99bp)-----                                                                                                                                                            | (mut, 8/12)<br>(mut, 4/12)                                        |
| #9 | CGCGCCACAGCAGCGGCCTCTGAACTTGGACAGCGAAACCATTGCTTCACT<br>CGCGCCACAGCAGCGGCCTCTG-----(-99bp)-----                                                                                                                                                            | (mut, 10/12)<br>(mut, 2/12)                                       |

**Supplementary Fig 9. Sequences of modified 52-bp elements in 8 founders**

Colony sequencing was performed to determine the detailed genotypes of CRISPR/Cas9-injected founder mice (#1, 2, 4-9 from Fig. 3c, d). Deleted sequences and inserted sequences are shown in red dashes and red characters, respectively. The fractions on the right indicate the mutant reads number out of total reads number.

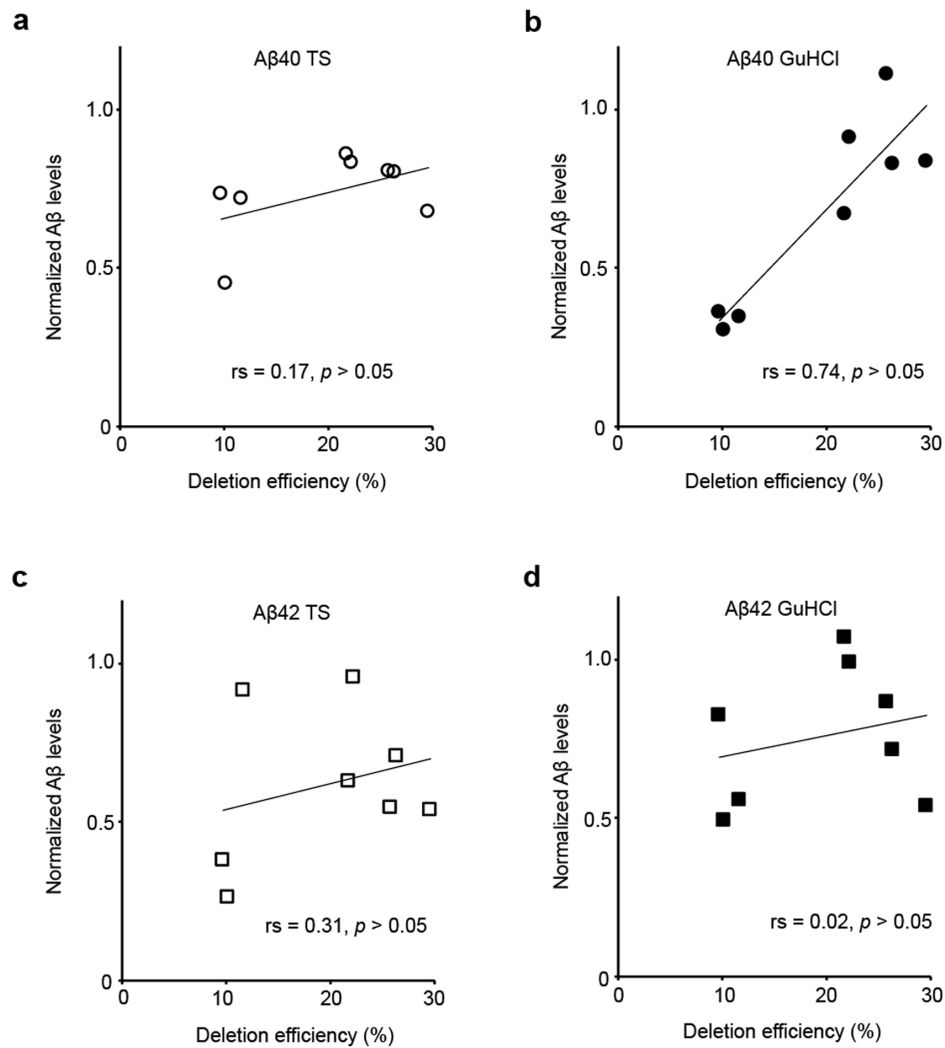

**Supplementary Fig 10. Relationship between deletion efficiency and Aβ levels in *NL-G-F* Δ100 mice.**

Aβ<sub>40</sub> (a, b) and Aβ<sub>42</sub> (c, d) levels in both the Tris-HCl-buffered saline (TS) and GuHCl fractions were quantified by ELISA. No clear correlation between normalized Aβ levels and deletion efficiency in 6-month-old *NL-G-F* Δ100 mouse brains ( $n = 8$ ). Note that one *NL-G-F* Δ100 mouse (#3) were excluded in this correlation analysis due to its complete different genotype (i.e. homozygous 34-bp deletion).

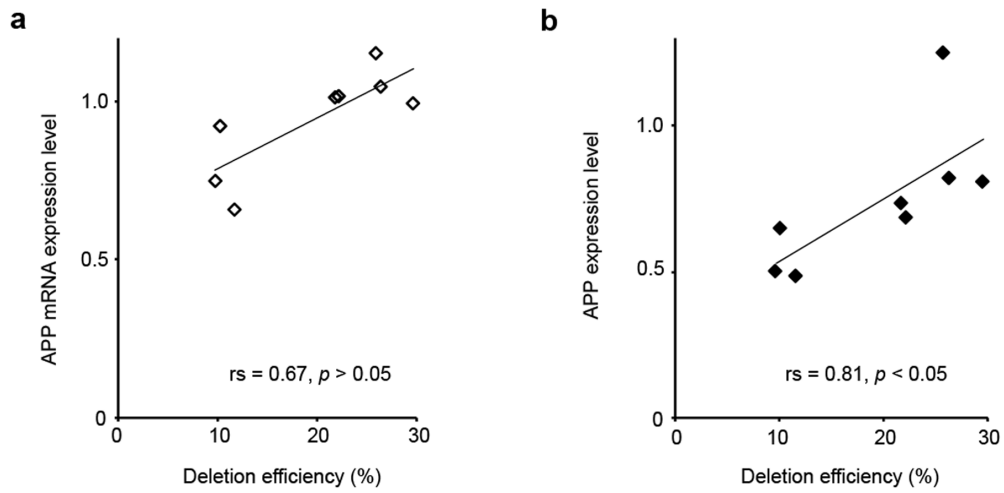

**Supplementary Fig 11. Relationship between deletion efficiency and APP expression levels in *NL-G-F*  $\Delta 100$  mice.**

APP expression levels in *NL-G-F*  $\Delta 100$  mice were assessed by quantitative PCR (a) or western blotting analysis (b). Note that one *NL-G-F*  $\Delta 100$  mouse (#3) were excluded in this correlation analysis.

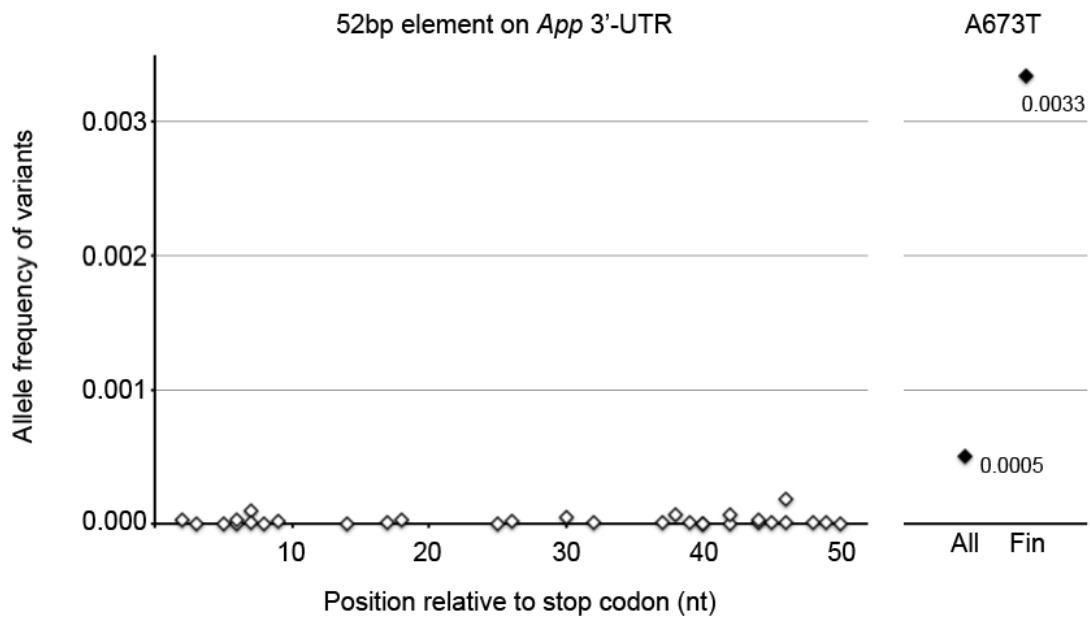

**Supplementary Fig 12. Allele frequency of variants in *App* 3'-UTR and A673T missense mutation**

Allele frequencies of variants were determined using publicly available variant databases (ExAC, <http://exac.broadinstitute.org>; gnomAD, <http://gnomad.broadinstitute.org>). The frequency of all variants in the 52-bp regulatory element on *App* 3'-UTR are quite low. In contrast, the allele frequency of a previously reported protective missense mutation (A673T) is relatively high, especially in the Finnish population (Fin).

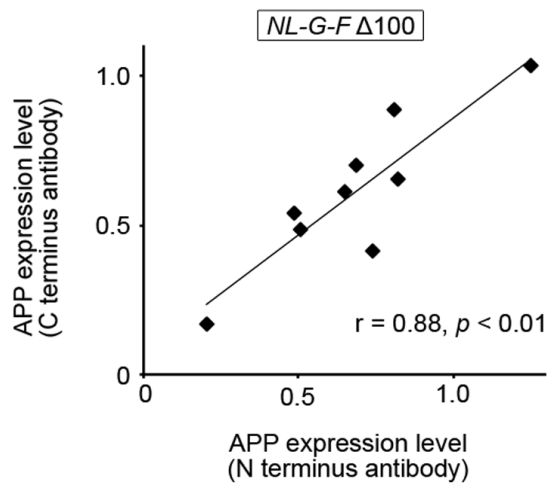

**Supplementary Fig 13. Validation of western blotting results with two distinct APP antibodies.**

Western blotting analyses were performed using two distinct APP antibodies: N-terminal APP antibody and C-terminal APP antibody. *NL-G-F  $\Delta$ 100* mouse brains were used as samples. The APP expression levels correlated well between the antibodies.

| Name                       | Sequence (5'-3')                         | Usage               |
|----------------------------|------------------------------------------|---------------------|
| APP 3UTR Fw                | tgccagcagaacggatgatgag                   | genotyping          |
| APP 3UTR Rev               | aaagaaacgtcttgccctgga                    |                     |
| APP 3UTR short deleted Fw  | ctctccaagatgcagcagaa                     |                     |
| APP 3UTR short deleted Rev | ccccatcgattttaaagca                      |                     |
| APP 3UTR T7-sgRNA 1 Fw     | taatacgcactcactataggGTTTCGCTGTCCAAGTTCAG | sgRNA synthesis     |
| APP 3UTR T7-sgRNA 2 Fw     | taatacgcactcactataggTCATAAGCACTTTTACGGGT |                     |
| APP 3UTR T7-sgRNA 3 Fw     | taatacgcactcactataggTATGCTTTAAAAATCGATGG |                     |
| APP 3UTR T7-sgRNA 4 Fw     | taatacgcactcactataggGGGATGCTTCTTGTGAACGT |                     |
| APP 3UTR T7-sgRNA 5 Fw     | taatacgcactcactataggTCCGTTTATTTACTCACCT  |                     |
| APP 3UTR T7-sgRNA 6 Fw     | taatacgcactcactataggAGCACAGCTGTCAAAAGCCG |                     |
| T7-sgRNA Rev               | aaaagcaccgactcggtgcc                     |                     |
| sgRNA-1_OT1 Fw             | aaacgtccatttcagcatca                     | off-target analysis |
| sgRNA-1_OT1 Rev            | tccctttggaaaagaggttt                     |                     |
| sgRNA-1_OT2 Fw             | caggatcttggccttagcc                      |                     |
| sgRNA-1_OT2 Rev            | ctggctgctgatttgtgtgt                     |                     |
| sgRNA-1_OT3 Fw             | gctccttctccctgtagcc                      |                     |
| sgRNA-1_OT3 Rev            | tctctgctgcttacgctcaa                     |                     |
| sgRNA-1_OT4 Fw             | tacaggccccacaagcatta                     |                     |
| sgRNA-1_OT4 Rev            | ctgggttctacatggcatt                      |                     |
| sgRNA-1_OT5 Fw             | gagattgcctgccaatgttt                     |                     |
| sgRNA-1_OT5 Rev            | gctcgggatacaagagttgc                     |                     |
| sgRNA-2_OT1 Fw             | gctcactgaaaaccactcc                      |                     |
| sgRNA-2_OT1 Rev            | tcagaggatggttcaccaca                     |                     |
| sgRNA-2_OT2 Fw             | ctgctgagggcatcctgta                      |                     |
| sgRNA-2_OT2 Rev            | tgcccagcctgttctaattt                     |                     |

**Supplementary Table 1. Primer sequences**

| Zygote Strain | Cas9/sgRNA-1/sgRNA-(2-6)<br>(ng/ $\mu$ l) | sgRNA combinations | Injected<br>Zygotes | Transferred<br>Zygotes | Live-Born<br>Pups | 3'-UTR Deleted<br>Founders/Pups (%) | Founder Name        |
|---------------|-------------------------------------------|--------------------|---------------------|------------------------|-------------------|-------------------------------------|---------------------|
| NL-G-F        | 10/10/10                                  | sgRNA-1, 2         | 103                 | 75                     | 24                | 4 (16.7)                            | NL-G-F $\Delta$ UTR |
| NL-G-F        | 30/30/30                                  | 1, 2               | 104                 | 80                     | 25                | 10 (40.0)                           | NL-G-F (unedited)   |
| NL-G-F        | 0/0/0                                     |                    | 105                 | 86                     | 35                |                                     | NL-G-F (unedited)   |
| NL-G-F        | 10/10/30                                  | 1, 3               | 130                 | 86                     | 33                | 9 (27.3)                            | NL-G-F $\Delta$ 400 |
| NL-G-F        | 10/10/30                                  | 1, 4               | 130                 | 103                    | 29                | 5 (17.2)                            | NL-G-F $\Delta$ 400 |
| C57BL/6       | 10/10/30                                  | 1, 3               | 75                  | 46                     | 20                | 3 (15.0)                            | WT $\Delta$ 400     |
| C57BL/6       | 10/10/30                                  | 1, 4               | 74                  | 47                     | 17                | 5 (29.4)                            | WT $\Delta$ 400     |
| C57BL/6       | 10/0/0                                    |                    | 66                  | 46                     | 19                |                                     | WT (unedited)       |
| NL-G-F        | 10/10/30                                  | 1, 5               | 130                 | 82                     | 37                | 7 (18.9)                            | NL-G-F $\Delta$ 100 |
| NL-G-F        | 10/10/30                                  | 1, 6               | 129                 | 79                     | 16                | 4 (25.0)                            | NL-G-F $\Delta$ 100 |
| NL-G-F        | 10/0/0                                    |                    | 50                  | 32                     | 15                |                                     | NL-G-F (unedited)   |

**Supplementary Table 2. Efficiency of CRISPR/Cas9-mediated *App* 3'-UTR deletion**



| sgRNA-1        | Target Sequence      | PAM (NGG) | Mismatches | Locus                    | Mutation/Total Number |
|----------------|----------------------|-----------|------------|--------------------------|-----------------------|
| ON             | GTTTCGCTGTCCAAGTTCAG | AGG       |            | Chr16:84955284-84955306  |                       |
| OT-1           | GTTGAGCTGTCCAAATTCAG | GGG       | 3          | ChrX:120201476-120201498 | 0/14                  |
| OT-2           | GTTTGTGTGTCCAAGTTCAG | GAG       | 3          | Chr1:53630507-53630529   | 0/14                  |
| OT-3           | GTTTCACTGTCCAAGTTCAG | TGG       | 3          | Chr7:112574971-112574993 | 0/14                  |
| OT-4           | GTTTCCTGTCAAGTTCAG   | GGG       | 3          | Chr13:74061778-74061800  | 0/14                  |
| OT-5           | GTTTCTGTCCAACATCAG   | TGG       | 3          | Chr6:124413763-124413785 | 0/14                  |
| <b>sgRNA-2</b> |                      |           |            |                          |                       |
| ON             | TCATAAGCACTTTTACGGGT | GGG       |            | Chr16:84954586-84954608  |                       |
| OT-1           | TCAAAGCTCTTTTACGGGC  | TGG       | 3          | Chr5:42759728-42759750   | 0/14                  |
| OT-2           | TCATAAGTACTGTTACAGGT | TGG       | 3          | Chr7:52434783-52434805   | 0/14                  |

**Supplementary Table 3. Off-target analysis in *App* 3'-UTR deleted founders**
